# Supplementary material for: Distinguishing clinical and genetic risk factors for suicidal ideation and behavior in a diverse hospital population
Source: bioRxiv or medRxiv preprint supplement (doi:10.1101/2024.07.30.24311218), 2024-08-01
Supplement: Supplementary file [file media-1.pdf]

**Table 1. Number of individuals of each phenotype identified according to each phenotyping method.**

Suicidal ideation (SI)-only case counts represent those after excluding suicidal behavior (SB). Controls are screened for the absence of both SB and SI. The prevalence in BioMe (N=45,956) for each group is in parentheses. More details are provided in **Supplementary Figure 1**. ICD = International Classification of Diseases.

| Phenotyping Method     | N Suicidal Behavior Cases<br>(prevalence) | N Suicidal Ideation-only Cases<br>(prevalence) | N Controls<br>(prevalence) |
|------------------------|-------------------------------------------|------------------------------------------------|----------------------------|
| ICD Code Only          | 62 (0.13%)                                | 60 (0.13%)                                     | 43,996 (95.73%)            |
| Note Only              | 950 (2.07%)                               | 801 (1.74%)                                    |                            |
| Both ICD Code and Note | 54 (0.12%)                                | 33 (0.07%)                                     |                            |
| Unique Total           | 1,066 (2.32%)                             | 894 (1.95%)                                    |                            |
